# Supplementary material
Source: MDPI journal article supplement (https://www.mdpi.com/2673-6772/2/4/27)
Supplement: s1 [file s1]

## Supplementary data S1. Household questionnaire.

### 1. Identification and georeference

|                          |  |             |  |
|--------------------------|--|-------------|--|
| <b>Settlement</b>        |  |             |  |
| <b>Household ID</b>      |  | <b>Date</b> |  |
| <b>Responsible adult</b> |  |             |  |

#### ¿Do you deworm your dogs?

☐ Yes ☐ No      If affirmative: ¿How often? \_\_\_\_\_

#### ¿Do you slaughter your animals at home?

☐ Yes ☐ No

If affirmative: ¿what do you do with the viscera?

☐ Feed the dogs with them raw      ☐ Re-use them to make food  
☐ Feed the dogs with them cooked      ☐ Other: \_\_\_\_\_

#### Codification of samples:

- 01: code for fecal samples with fresh or dry, are codified using 01 and then starting with 001, the number of samples collected: 01-001, 01-002, etc.

### 2. Fecal samples from dogs

| <b>Code</b>   | <b>Observations (Place where the sample was collected from – ex.: next to the house, next to a tree, etc.)</b> |
|---------------|----------------------------------------------------------------------------------------------------------------|
| <b>01-001</b> |                                                                                                                |
| <b>01-002</b> |                                                                                                                |
| <b>01-003</b> |                                                                                                                |
| <b>01-004</b> |                                                                                                                |
| <b>01-005</b> |                                                                                                                |
| <b>01-006</b> |                                                                                                                |
| <b>01-007</b> |                                                                                                                |
| <b>01-008</b> |                                                                                                                |
| <b>01-009</b> |                                                                                                                |
| <b>01-010</b> |                                                                                                                |
